# Supplementary material for: Focused radiation heating for controlled high temperature chemistry, exemplified with the preparation of vanadium nitride nanoparticles
Source: Royal Society of Chemistry journal article supplement (doi:10.1039/c3ra41040d), 2013-01-01
Supplement: c3ra41040d.pdf [file c3ra41040d.pdf]

## Supplementary data

### Focused Radiation Heating for Controlled High temperature Chemistry, exemplified with the Preparation of Vanadium Nitride Nanoparticles

Tristan Corbiere, Debora Ressnig, Cristina Giordano, Markus Antonietti<sup>a</sup>

<sup>a</sup> Max Planck Institute of Colloids and Interfaces, Colloids Department, Am Muehlenberg 1, 14476 Potsdam, Germany

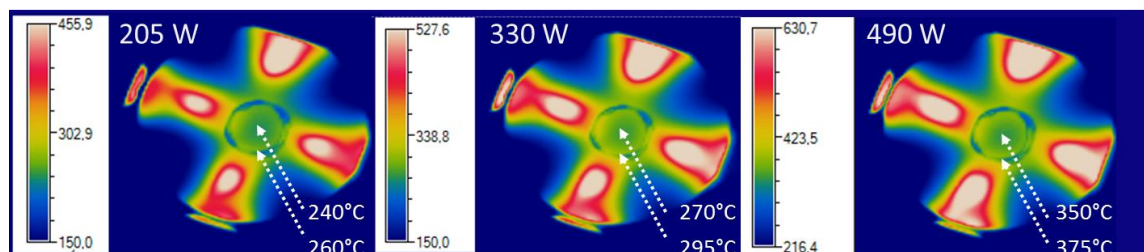

**Fig. 1:** IR images obtained for different applied powers with the modified glass frit. A Inconel wire rolled as a ring is placed at the center position to represent the crucible position. The emissivity values of the Inconel wire are smaller than the one of silicon carbide resulting in an apparently colder ring.

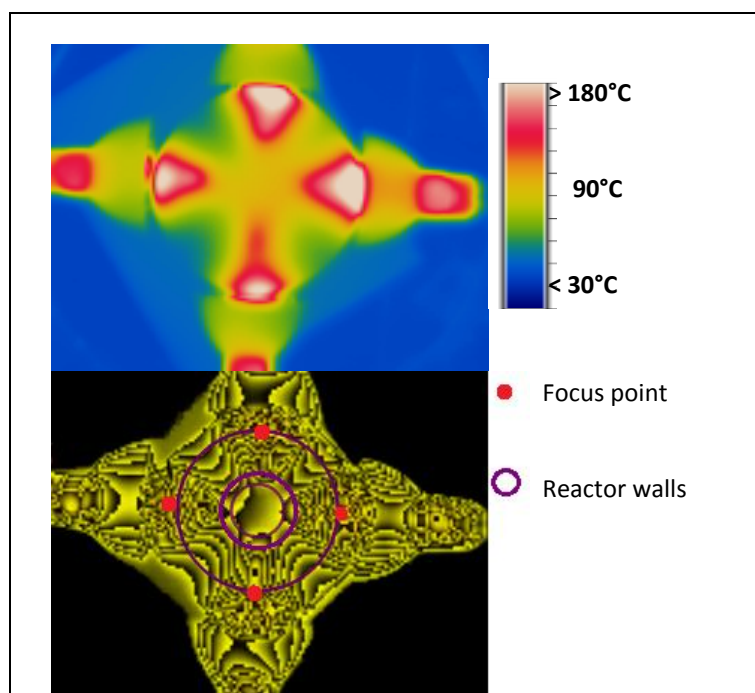

**Fig. 2:** IR image obtained for an applied power of 252 W with the non modified glass frit. Below, a picture shows the distribution of the various isothermal areas (black –yellow alternate regions).

| R (Urea:V) | Elemental analysis wt%                                   |       |        |       |
|------------|----------------------------------------------------------|-------|--------|-------|
|            | 5 min                                                    |       | 30 min |       |
|            | N                                                        | C     | N      | C     |
| 3          | 8,8                                                      | 1,5   | 8,8    | 1,6   |
| 5          | 13,4                                                     | 9,7   | 12,4   | 8,7   |
| 7          | 15,9                                                     | 5,5   | 13,7   | 9,3   |
|            | nanoparticles size estimated mean diameter range (in nm) |       |        |       |
| 3          | 1                                                        | to 5  | 5      | to 12 |
| 5          | 2                                                        | to 15 | 10     | to 15 |
| 7          | 2                                                        | to 7  | 7      | to 25 |

**Fig. 3:** Elemental analysis and mean size diameter (extracted from TEM pictures) of vanadium nitride nanoparticles prepared with various ratio R (Urea:V) and different reaction times (30 min and 5 min)

| Reaction temperature | Elemental analysis wt% |      | Estimated mean diameter range (in nm) |       |
|----------------------|------------------------|------|---------------------------------------|-------|
|                      | N                      | C    |                                       |       |
| 750 °C               | 12,4                   | 8,7  | 10                                    | to 15 |
| 650 °C*              | 13,3                   | 10,6 | 8                                     | to 16 |
| 550 °C*              | 9                      | 9,5  | 2                                     | to 10 |

\*Vanadium oxide needles observed ( length: 100 to 500 nm)

**Fig. 4:** Elemental analysis and mean size diameter (extracted from TEM pictures) of vanadium nitride nanoparticles prepared under various reaction temperatures

| Heating rates (in K.min <sup>-1</sup> ) | Reaction time (in min) | Elemental analysis wt% |      | Estimated mean diameter range (in nm) |       |
|-----------------------------------------|------------------------|------------------------|------|---------------------------------------|-------|
|                                         |                        | N                      | C    |                                       |       |
| 100                                     | 30                     | 10,75                  | 8,15 | 1                                     | to 4  |
|                                         | 5*                     | 11,05                  | 8,25 | 10                                    | to 22 |
| 50                                      | 30                     | 8,8                    | 1,5  | 5                                     | to 12 |
|                                         | 5                      | 8,8                    | 1,55 | 1                                     | to 10 |

\* mean diameter of aggregates and not single particles that must be smaller than 4 nm

**Fig. 5:** Elemental analysis and mean size diameter (extracted from TEM pictures) of vanadium nitride nanoparticles prepared under various heating rate preparation conditions
